# Supplementary material
Source: PubMed Central journal article supplement (PMC6083022)
Supplement: NIHMS983918-supplement-1.pdf [file NIHMS983918-supplement-1.pdf]

Supplementary Table 1. (Top) Factor loadings of performance variables on neurocognitive constructs (principal components analysis with varimax rotation); (bottom) correlation matrix of resultant neurocognitive factors with demographic and functional outcome variables.

| Neurocognitive Factor Loadings                                                                                                     | Visuospatial           |                            | Phonological        |                         | Processing Speed (F4)          |
|------------------------------------------------------------------------------------------------------------------------------------|------------------------|----------------------------|---------------------|-------------------------|--------------------------------|
|                                                                                                                                    | Working Memory (F1)    | Behavioral Inhibition (F2) | Working Memory (F3) | Processing Speed (F4)   |                                |
| VS3                                                                                                                                | <b>.83</b>             | .31                        | .13                 | -.17                    |                                |
| VS4                                                                                                                                | <b>.94</b>             | .03                        | .04                 | .02                     |                                |
| VS5                                                                                                                                | <b>.87</b>             | .14                        | .29                 | .03                     |                                |
| VS6                                                                                                                                | <b>.78</b>             | -.08                       | .22                 | .26                     |                                |
| PH3                                                                                                                                | .41                    | -.05                       | .23                 | .01                     |                                |
| PH4                                                                                                                                | .29                    | .02                        | <b>.85</b>          | .18                     |                                |
| PH5                                                                                                                                | .20                    | .19                        | <b>.91</b>          | -.01                    |                                |
| PH6                                                                                                                                | .25                    | .19                        | <b>.88</b>          | -.08                    |                                |
| MRT1                                                                                                                               | .40                    | .15                        | -.18                | <b>.86</b>              |                                |
| MRT2                                                                                                                               | .09                    | .26                        | .20                 | <b>.85</b>              |                                |
| MRT3                                                                                                                               | -.06                   | .43                        | .07                 | <b>.74</b>              |                                |
| MRT4                                                                                                                               | .09                    | <b>.67</b>                 | .05                 | .42                     |                                |
| SSD1                                                                                                                               | -.12                   | <b>.82</b>                 | -.00                | .05                     |                                |
| SSD2                                                                                                                               | .15                    | <b>.71</b>                 | .06                 | .41                     |                                |
| SSD3                                                                                                                               | .15                    | <b>.80</b>                 | .17                 | .24                     |                                |
| SSD4                                                                                                                               | .09                    | <b>.75</b>                 | .18                 | .10                     |                                |
| <b>Intercorrelations of Neurocognitive Factors 1-4 (Above) and FSIQ (Right) with Demographic and Functioning Variables (Below)</b> |                        |                            |                     |                         | <b>FSIQ<sub>residual</sub></b> |
| FSIQ                                                                                                                               | <b>.34*</b>            | .20                        | <b>.32*</b>         | .22                     | <b>.83**</b>                   |
| FSIQ <sub>residual</sub>                                                                                                           | .00                    | .00                        | .00                 | .00                     | --                             |
| SES                                                                                                                                | <b>.29<sup>†</sup></b> | -.17                       | <b>.36*</b>         | .07                     | .07                            |
| Medication Status (No/Yes)                                                                                                         | -.18                   | .11                        | -.10                | -.27                    | .03                            |
| Gender (Female/Male)                                                                                                               | -.20                   | .03                        | .14                 | .08                     | -.08                           |
| Age                                                                                                                                | .19                    | -.03                       | -.01                | -.05                    | <b>-.32*</b>                   |
| Peer Functioning (Parent)                                                                                                          | -.05                   | .06                        | <b>.33*</b>         | .05                     | -.06                           |
| Peer Functioning (Teacher)                                                                                                         | -.05                   | -.18                       | .27                 | <b>-.29<sup>†</sup></b> | .22                            |
| Parent-Child Attachment                                                                                                            | .24                    | -.27                       | -.24                | -.09                    | .08                            |
| Parent-Child Communication                                                                                                         | .19                    | -.11                       | -.04                | <b>-.29<sup>†</sup></b> | -.06                           |
| Parental Involvement                                                                                                               | <b>.32*</b>            | -.16                       | .14                 | .05                     | <b>-.35*</b>                   |
| Parenting Confidence                                                                                                               | .27                    | <b>-.43**</b>              | <b>-.33*</b>        | -.10                    | .06                            |
| Academic Functioning Total                                                                                                         | .15                    | -.02                       | <b>.45**</b>        | .09                     | <b>.28<sup>†</sup></b>         |
| Academic Success                                                                                                                   | .15                    | -.05                       | <b>.45**</b>        | .13                     | <b>.42**</b>                   |
| Academic Productivity                                                                                                              | .07                    | -.06                       | <b>.41**</b>        | .03                     | .15                            |

## ADHD FUNCTIONAL IMPAIRMENTS

*Notes.*  $N = 44$ ; Values within the top panel represent factor loadings for the 16 neurocognitive variables (4 blocks per task). Factor loadings equal or greater than .45 shown in bold. Values in the bottom panel represent correlations between the neurocognitive construct factors and demographic, peer, family, and academic functioning variables. Intercorrelations among the 4 neurocognitive factors are all .00 by design ( $p > .99$ ); subject-level data for each of the 4 neurocognitive factors are z-scores with a mean of 0.0 and SD of 1.0 based on the current sample; MRT = mean reaction time during correct go trials, stop-signal task blocks 1-4; PH = phonological working memory task, set sizes 3-6; SSD = stop-signal delay, stop-signal task blocks 1-4; VS = visuospatial working memory task, set sizes 3-6;

\*\*  $p < .01$ ; \*  $p < .05$ ; †  $p < .08$
